# Supplementary material for: Toehold probe-based interrogation for haplotype phasing of long nucleic acid strands
Source: Royal Society of Chemistry journal article supplement (doi:10.1039/d0ay00946f), 2020-01-01

## **Electronic Supplementary Information (ESI)**

### **Toehold Probe-based Interrogation for Haplotype Phasing of Long Nucleic Acid Strands**

Xinyu Zhuang <sup>a</sup>, Henson L Lee Yu <sup>b</sup>, and I-Ming Hsing <sup>a,b,\*</sup>

Department of Chemical and Biological Engineering, The Hong Kong University of Science and Technology, Clear Water Bay, Kowloon, Hong Kong

\*Email: [kehising@ust.hk](mailto:kehising@ust.hk)

**Table S1** sequence information and clam structure

|                             |                                                                                                                                                                                                                                                                                                                                                                                                                                                                                                                                                                                                                                                                                                                                                                                                                                                                                                                                                                                                                                                                                                                                                                                                                                                                                                                                                                                                                                                                                       |
|-----------------------------|---------------------------------------------------------------------------------------------------------------------------------------------------------------------------------------------------------------------------------------------------------------------------------------------------------------------------------------------------------------------------------------------------------------------------------------------------------------------------------------------------------------------------------------------------------------------------------------------------------------------------------------------------------------------------------------------------------------------------------------------------------------------------------------------------------------------------------------------------------------------------------------------------------------------------------------------------------------------------------------------------------------------------------------------------------------------------------------------------------------------------------------------------------------------------------------------------------------------------------------------------------------------------------------------------------------------------------------------------------------------------------------------------------------------------------------------------------------------------------------|
| Probe A F(4 <sup>th</sup> ) | /5Alex647N/TCCAACATAAGACATTCAGGTCGCGCCCCGTTGAAGAAGTCCTGC                                                                                                                                                                                                                                                                                                                                                                                                                                                                                                                                                                                                                                                                                                                                                                                                                                                                                                                                                                                                                                                                                                                                                                                                                                                                                                                                                                                                                              |
| Probe A Q(4 <sup>th</sup> ) | GGCGCGACCTGAATGTCTTATGTTGGA/3IAbRQSp/                                                                                                                                                                                                                                                                                                                                                                                                                                                                                                                                                                                                                                                                                                                                                                                                                                                                                                                                                                                                                                                                                                                                                                                                                                                                                                                                                                                                                                                 |
| Probe B F                   | /5' ATTO488N/ACCTACATCCTCGGCTGCCAGGTCGGAATATTCCAGGGTTTTCCGCAAAAAA                                                                                                                                                                                                                                                                                                                                                                                                                                                                                                                                                                                                                                                                                                                                                                                                                                                                                                                                                                                                                                                                                                                                                                                                                                                                                                                                                                                                                     |
| Probe B Q                   | CCGACCTGGCAGCCGAGGATGTAGGT/3`IABkFQ/                                                                                                                                                                                                                                                                                                                                                                                                                                                                                                                                                                                                                                                                                                                                                                                                                                                                                                                                                                                                                                                                                                                                                                                                                                                                                                                                                                                                                                                  |
| Sink P                      | GGCGCGACCTGAATGTCTTATGTTGGA/3`Inverted dT/                                                                                                                                                                                                                                                                                                                                                                                                                                                                                                                                                                                                                                                                                                                                                                                                                                                                                                                                                                                                                                                                                                                                                                                                                                                                                                                                                                                                                                            |
| Sink C                      | TCCAACATAAGACATTCAGGTCGCGCCCCGTTGAAGAAGTCTTGC/3`Inverted dT/                                                                                                                                                                                                                                                                                                                                                                                                                                                                                                                                                                                                                                                                                                                                                                                                                                                                                                                                                                                                                                                                                                                                                                                                                                                                                                                                                                                                                          |
| Reverse primer              | /5Phos/CTTGTTCAGGTCGCGCCCCGTT                                                                                                                                                                                                                                                                                                                                                                                                                                                                                                                                                                                                                                                                                                                                                                                                                                                                                                                                                                                                                                                                                                                                                                                                                                                                                                                                                                                                                                                         |
| Forward primer              | GCG GCA CTC TGG CCT CTG ATT G                                                                                                                                                                                                                                                                                                                                                                                                                                                                                                                                                                                                                                                                                                                                                                                                                                                                                                                                                                                                                                                                                                                                                                                                                                                                                                                                                                                                                                                         |
| Probe A F(1 <sup>st</sup> ) | /5ATTO488N/ACCTACATCCTCGGCTGCCAGGTCGGAATATTCCAGGGTTTTCCGCAAAAAA                                                                                                                                                                                                                                                                                                                                                                                                                                                                                                                                                                                                                                                                                                                                                                                                                                                                                                                                                                                                                                                                                                                                                                                                                                                                                                                                                                                                                       |
| Probe A Q(1 <sup>st</sup> ) | CCGACCTGGCAGCCGAGGATGTAGGT/3IABkFQ/                                                                                                                                                                                                                                                                                                                                                                                                                                                                                                                                                                                                                                                                                                                                                                                                                                                                                                                                                                                                                                                                                                                                                                                                                                                                                                                                                                                                                                                   |
| Probe A F(2 <sup>nd</sup> ) | /5Alex647N/TCCAACATAAGACATTCAGGTCGCGCCCCGTTGAAGAAGTCCTGCA                                                                                                                                                                                                                                                                                                                                                                                                                                                                                                                                                                                                                                                                                                                                                                                                                                                                                                                                                                                                                                                                                                                                                                                                                                                                                                                                                                                                                             |
| Probe A Q(2 <sup>nd</sup> ) | GGCGCGACCTGATGTCTTATGTTGGA/3IAbRQSp/                                                                                                                                                                                                                                                                                                                                                                                                                                                                                                                                                                                                                                                                                                                                                                                                                                                                                                                                                                                                                                                                                                                                                                                                                                                                                                                                                                                                                                                  |
| Probe A F(3 <sup>rd</sup> ) | /5Alex647N/TCCAACATAAGACATTCAGGTCGCGCCCCGTTGAAGAAGTCCTG                                                                                                                                                                                                                                                                                                                                                                                                                                                                                                                                                                                                                                                                                                                                                                                                                                                                                                                                                                                                                                                                                                                                                                                                                                                                                                                                                                                                                               |
| Probe A Q(3 <sup>rd</sup> ) | GCGCGACCTGAATGTCTT ATG TTG GA/3IAbRQSp/                                                                                                                                                                                                                                                                                                                                                                                                                                                                                                                                                                                                                                                                                                                                                                                                                                                                                                                                                                                                                                                                                                                                                                                                                                                                                                                                                                                                                                               |
| Sink P(2 <sup>nd</sup> )    | GGCGCGACCTGATGTCTTCTGTAGGC/3InvdT/                                                                                                                                                                                                                                                                                                                                                                                                                                                                                                                                                                                                                                                                                                                                                                                                                                                                                                                                                                                                                                                                                                                                                                                                                                                                                                                                                                                                                                                    |
| Sink C(2 <sup>nd</sup> )    | GCCTACAGAAGACATCAGGTCGCGCCCCGTTGAAGAAGTCTTGCAG /3InvdT/                                                                                                                                                                                                                                                                                                                                                                                                                                                                                                                                                                                                                                                                                                                                                                                                                                                                                                                                                                                                                                                                                                                                                                                                                                                                                                                                                                                                                               |
| Sink P(3 <sup>rd</sup> )    | GCGCGACCTGAATGTCACATGTTGGT/3InvdT/                                                                                                                                                                                                                                                                                                                                                                                                                                                                                                                                                                                                                                                                                                                                                                                                                                                                                                                                                                                                                                                                                                                                                                                                                                                                                                                                                                                                                                                    |
| Sink C(3 <sup>rd</sup> )    | ACCAACATGTGACATTCAGGTCGCGCCCCGTTGAAGAAGTCTT G/3InvdT/                                                                                                                                                                                                                                                                                                                                                                                                                                                                                                                                                                                                                                                                                                                                                                                                                                                                                                                                                                                                                                                                                                                                                                                                                                                                                                                                                                                                                                 |
| TD                          | <u>CGGGCACTCTGGCCCTGATTGGTCCAAGGAAGGCTGGGGGACAGGACGGGAGGCGAAACCCCTGGAATATTCCCGACCTGGCAGCCTCATCGAGCTCGGTGATTGGCTCAGAAGGGAAAGGCGGGTCTCCGTGACGACTTATAAAAGCCAGGGGCAAGCGGTCCGGATAACGGCTAGCTGAGGAGCTGCTGGCAGTCCACTACTCTTTTCGAGAGTGACTCCCGTTGTCCAAAGGCTTCCAGAGCGAAACCTGTGCGGTGACAGGACCCGGCGCTCGAGTTCCGGGCTCCGGAAGGACCGAGCTCTCTCCGGATCCAGTGTCCGTTTCCAGCCCCAATCTCAGAGCGGAGCCACAGAGAGAGGAAACCCGGCATGGCCAAGCGCCGGCGATCGGCATCGACCTGGGCACCACTACTCTCGTGGGGGTGTTCACACGGCAAGGTGGAGATCATCGCCAACGACCAAGGGCAACCCGACACCCAGCTACGTGGCCTTACGGACACCGAGCGGCTCATCGGGATCGGGCAAGAACCAGGTGGCGCTGAACCCGCAAAACACCGTGTGACCGGAAGCGGCTGATTGGCCGAAGTTCGGCGACCCGGTGGTGCAGTCGGACATGAAGCACTGGCCTTTCCAGGTGATCAA</u><br>CGACGGAGACAAGCCAAAGGTGCAGGTGAGCTACAAGGGGGAGACCAAGGCAATTCTACCCGAGGAGATCTGCTCATGTTGCTGACCAAGATGAAGGAGATCGCCGAGGCGTACCTGGGTACCCGGTACCGGATGACCAACCGGTTGATCACCGTTCGGGCTACTTCAACGACTCGCAGCCAGGCCACCAAGATGCGGGTGTGATCGCGGGGCTCAACGTGCTCGGATCATCAACGAGCCACCGCCGCCATCGCTACGGCTGGACAGAAAGGGCAAGGGGCAAGGGCAAGGGCAACCTGTGCTCCAGCACCAGGCCAGCTGGAGATCGACTCCC<br>TGTTTGAAGGCATCGACTTCTACAGTCCATACCAAGGGCGAGGTTGAGGAGCTGTGCTCCGACCTGTTCGAAGCACCTGGAGCCGTGGAGAAAGGCTCTCGCGCAGCCAGCTGGACAAGGCCAGATTACAGCACTGGTCTGTGTCGGGGGCTCCACCCGATCCCAAGGTGCAGAAGTGTGTCGAAGACTTCTCAACGGGCGGACCTGAACAAG                                                                                                                                                                                                                               |
| TA                          | <u>CGGGCACTCTGGCCCTGATTGGTCCAAGGAAGGCTGGGGGACAGGACGGGAGGCGAAACCCCTGGAATATTCCCGACCTGGCAGCCTCATCGAGCTCGGTGATTGGCTCAGAAGGGAAAGGCGGGTCTCCGTGACGACTTATAAAAGCCAGGGGCAAGCGGTCCGGATAACGGCTAGCTGAGGAGCTGCTGGCAGTCCACTACTCTTTTCGAGAGTGACTCCCGTTGTCCAAAGGCTTCCAGAGCGAAACCTGTGCGGTGACAGGACCCGGCGCTCGAGTTCCGGGCTCCGGAAGGACCGAGCTCTCTCCGGATCCAGTGTCCGTTTCCAGCCCCAATCTCAGAGCGGAGCCACAGAGAGAGGAAACCCGGCATGGCCAAGCGCCGGCGATCGGCATCGACCTGGGCACCACTACTCTCGTGGGGGTGTTCACACGGCAAGGTGGAGATCATCGCCAACGACCAAGGGCAACCCGACACCCAGCTACGTGGCCTTACGGACACCGAGCGGCTCATCGGGATCGGGCAAGAACCAGGTGGCGCTGAACCCGCAAAACACCGTGTGACCGGAAGCGGCTGATTGGCCGAAGTTCGGCGACCCGGTGGTGCAGTCGGACATGAAGCACTGGCCTTTCCAGGTGATCAA</u><br>CGACGGAGACAAGCCAAAGGTGCAGGTGAGCTACAAGGGGGAGACCAAGGCAATTCTACCCGAGGAGATCTGCTCATGTTGCTGACCAAGATGAAGGAGATCGCCGAGGCGTACCTGGGTACCCGGTACCGGATGACCAACCGGTTGATCACCGTTCGGGCTACTTCAACGACTCGCAGCCAGGCCACCAAGATGCGGGTGTGATCGCGGGGCTCAACGTGCTCGGATCATCAACGAGCCACCGCCGCCATCGCTACGGCTGGACAGAAAGGGCAAGGGGCAAGGGCAAGGGCAACCTGTGCTCCAGCACCAGGCCAGCTGGAGATCGACTCCC<br>TGTTTGAAGGCATCGACTTCTACAGTCCATACCAAGGGCGAGGTTGAGGAGCTGTGCTCCGACCTGTTCGAAGCACCTGGAGCCGTGGAGAAAGGCTCTCGCGCAGCCAGCTGGACAAGGCCAGATTACAGCACTGGTCTGTGTCGGGGGCTCCACCCGATCCCAAGGTGCAGAAGTGTGTCGAAGACTTCTCAACGGGCGGACCTGAACAAG                                                                                                                                                                                                                               |
| TB                          | <u>CGGGCACTCTGGCCCTGATTGGTCCAAGGAAGGCTGGGGGACAGGACGGGAGGCGAAACCCCTGGAATATTCCCGACCTGGCAGCCTCATCGAGCTCGGTGATTGGCTCAGAAGGGAAAGGCGGGTCTCCGTGACGACTTATAAAAGCCAGGGGCAAGCGGTCCGGATAACGGCTAGCTGAGGAGCTGCTGGCAGTCCACTACTCTTTTCGAGAGTGACTCCCGTTGTCCAAAGGCTTCCAGAGCGAAACCTGTGCGGTGACAGGACCCGGCGCTCGAGTTCCGGGCTCCGGAAGGACCGAGCTCTCTCCGGATCCAGTGTCCGTTTCCAGCCCCAATCTCAGAGCGGAGCCACAGAGAGAGGAAACCCGGCATGGCCAAGCGCCGGCGATCGGCATCGACCTGGGCACCACTACTCTCGTGGGGGTGTTCACACGGCAAGGTGGAGATCATCGCCAACGACCAAGGGCAACCCGACACCCAGCTACGTGGCCTTACGGACACCGAGCGGCTCATCGGGATCGGGCAAGAACCAGGTGGCGCTGAACCCGCAAAACACCGTGTGACCGGAAGCGGCTGATTGGCCGAAGTTCGGCGACCCGGTGGTGCAGTCGGACATGAAGCACTGGCCTTTCCAGGTGATCAA</u><br>CGACGGAGACAAGCCAAAGGTGCAGGTGAGCTACAAGGGGGAGACCAAGGCAATTCTACCCGAGGAGATCTGCTCATGTTGCTGACCAAGATGAAGGAGATCGCCGAGGCGTACCTGGGTACCCGGTACCGGATGACCAACCGGTTGATCACCGTTCGGGCTACTTCAACGACTCGCAGCCAGGCCACCAAGGATGCGGGTGTGATCGCGGGGCTCAACGTGCTCGGATCATCAACGAGCCACCGCCGCCATCGCTACGGCTGGACAGAAAGGGCAAGGGGAGGGCAACGTGCTCATTTTACCTGGGCGGGGCACTTCGACGTGTCCATCTGACGATCGACGACGGCATCTCGAGGTGAAGGGCAAGGGCGGGGACCCACTGGGTGGGAGGACTTTGACAACAGGCTGGTGAACCACTTCGTGGAGGAGTTCAAGAGAAACACAAGAAGGACATCAGCCA<br>GAACAAGCGAGCCGTGAGGCGGCTGCGCACCGCTCGGAGAGGGCCAAAGAGGACCTGTGCTCCAGCACCAGGCCAGCTGGAGATCGACTCCC<br>TGTTTGAAGGCATCGACTTCTACAGTCCATACCAAGGGCGAGGTTGAGGAGCTGTGCTCCGACCTGTTCGAAGCACCTGGAGCCGTGGAGAAAGGCTCTCGCGCAGCCAGCTGGACAAGGCCAGATTACAGCACTGGTCTGTGTCGGGGGCTCCACCCGATCCCAAGGTGCAGAAGTGTGTCGAAGACTTCTCAACGGGCGGACCTGAACAAG |
| WT                          | <u>CGGGCACTCTGGCCCTGATTGGTCCAAGGAAGGCTGGGGGACAGGACGGGAGGCGAAACCCCTGGAATATTCCCGACCTGGCAGCCTCATCGAGCTCGGTGATTGGCTCAGAAGGGAAAGGCGGGTCTCCGTGACGACTTATAAAAGCCAGGGGCAAGCGGTCCGGATAACGGCTAGCTGAGGAGCTGCTGGCAGTCCACTACTCTTTTCGAGAGTGACTCCCGTTGTCCAAAGGCTTCCAGAGCGAAACCTGTGCGGTGACAGGACCCGGCGCTCGAGTTCCGGGCTCCGGAAGGACCGAGCTCTCTCCGGATCCAGTGTCCGTTTCCAGCCCCAATCTCAGAGCGGAGCCACAGAGAGAGGAAACCCGGCATGGCCAAGCGCCGGCGATCGGCATCGACCTGGGCACCACTACTCTCGTGGGGGTGTTCACACGGCAAGGTGGAGATCATCGCCAACGACCAAGGGCAACCCGACACCCAGCTACGTGGCCTTACGGACACCGAGCGGCTCATCGGGATCGGGCAAGAACCAGGTGGCGCTGAACCCGCAAAACACCGTGTGACCGGAAGCGGCTGATTGGCCGAAGTTCGGCGACCCGGTGGTGCAGTCGGACATGAAGCACTGGCCTTTCCAGGTGATCAA</u><br>CGACGGAGACAAGCCAAAGGTGCAGGTGAGCTACAAGGGGGAGACCAAGGCAATTCTACCCGAGGAGATCTGCTCATGTTGCTGACCAAGATGAAGGAGATCGCCGAGGCGTACCTGGGTACCCGGTACCGGATGACCAACCGGTTGATCACCGTTCGGGCTACTTCAACGACTCGCAGCCAGGCCACCAAGGATGCGGGTGTGATCGCGGGGCTCAACGTGCTCGGATCATCAACGAGCCACCGCCGCCATCGCTACGGCTGGACAGAAAGGGCAAGGGGAGGGCAACGTGCTCATTTTACCTGGGCGGGGCACTTCGACGTGTCCATCTGACGATCGACGACGGCATCTCGAGGTGAAGGGCAAGGGCGGGGACCCACTGGGTGGGAGGACTTTGACAACAGGCTGGTGAACCACTTCGTGGAGGAGTTCAAGAGAAACACAAGAAGGACATCAGCCA<br>GAACAAGCGAGCCGTGAGGCGGCTGCGCACCGCTCGGAGAGGGCCAAAGAGGACCTGTGCTCCAGCACCAGGCCAGCTGGAGATCGACTCCC<br>TGTTTGAAGGCATCGACTTCTACAGTCCATACCAAGGGCGAGGTTGAGGAGCTGTGCTCCGACCTGTTCGAAGCACCTGGAGCCGTGGAGAAAGGCTCTCGCGCAGCCAGCTGGACAAGGCCAGATTACAGCACTGGTCTGTGTCGGGGGCTCCACCCGATCCCAAGGTGCAGAAGTGTGTCGAAGACTTCTCAACGGGCGGACCTGAACAAG |

\*Underline is primer binding region and the green one is SNP B site and red is SNP A.

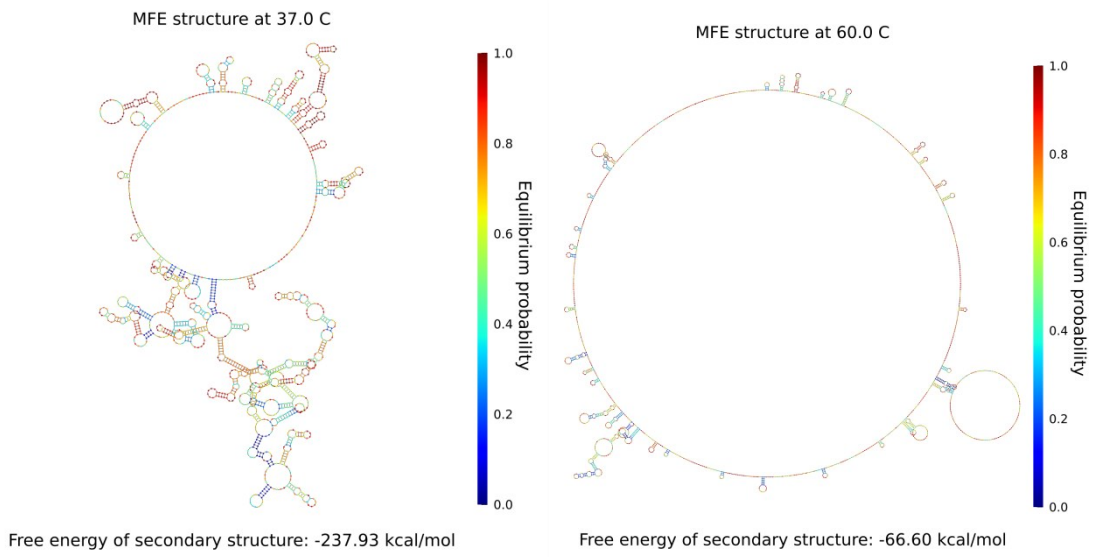

**Figure S1** Possible secondary structures of the target (TD) sequence at 37.0°C and 60 °C by NUPACK, respectively.

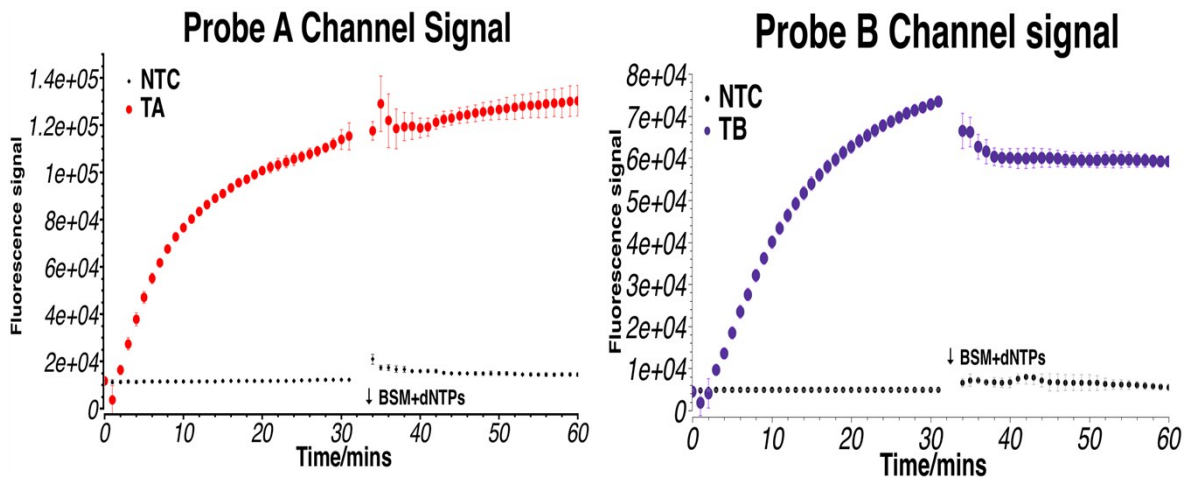

**Figure S2** stability experiment of the probe A, probe B and sink probe. NTC represents negative control(without targets, only have probe A, probe B and sink probe).

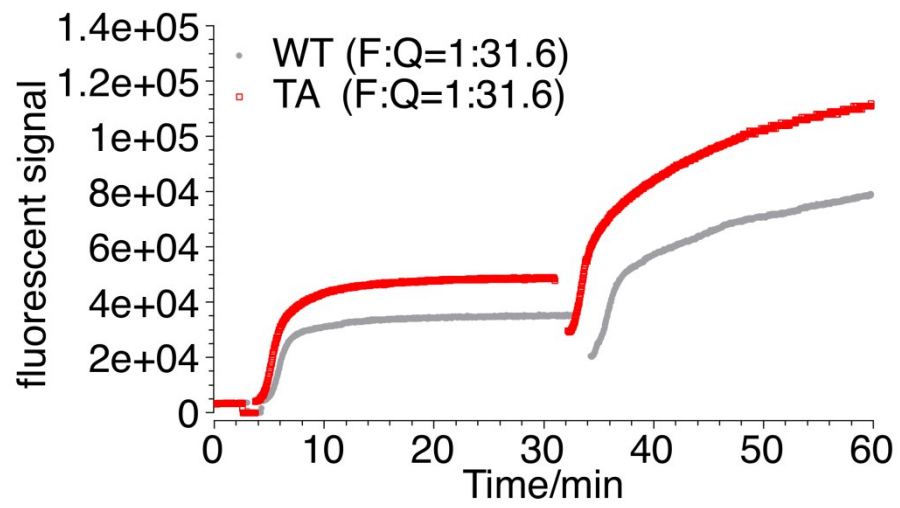

**Figure S3** Fluorescence signals of 20nM WT and TA incubated with 20nM probe A, 20nM probe B, 1uM dNTPs and 8 units bsm in A channel. The fluorophore to quencher strands ratio of toehold probe A is 31.6:1.

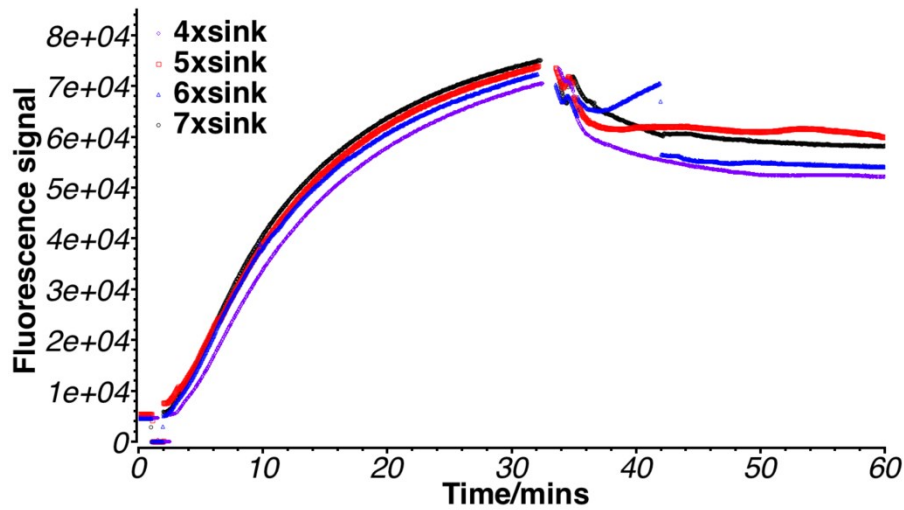

**Figure S4** Fluorescence measurement of 20nM TB in 80nM(4x), 100nM(5x), 120nM(6x) and 140nM(7x) sink system in B channel, respectively. TB in 5x sink system was observed with lowest and stable drop compared to 4x, 6x and 7x.

**Table S2**  $\Delta\text{Grxn}$  and  $\Delta\Delta\text{G}$  calculation by NUPACK of four kinds of different-design probe A. The Numbers in parentheses represent nucleotide numbers near SNP A sites of probe A fluorophore strand.

|                             | TD $\Delta\text{Grxn}$ | TB $\Delta\text{Grxn}$ | $\Delta\Delta\text{G}$ |
|-----------------------------|------------------------|------------------------|------------------------|
| 1 <sup>st</sup> probe A(27) | -4.11                  | -0.4                   | 3.71                   |
| 2 <sup>nd</sup> probe A(4)  | -2.21                  | -0.29                  | 1.92                   |
| 3 <sup>rd</sup> probe A(2)  | -4.14                  | -1.8                   | 2.34                   |
| 4 <sup>th</sup> probe A(3)  | -3.98                  | -0.79                  | 3.19                   |

a)

b)

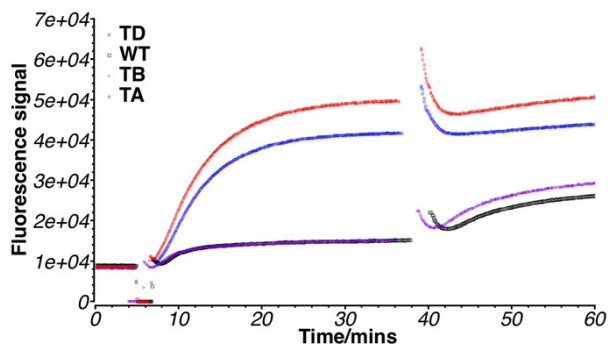

c)

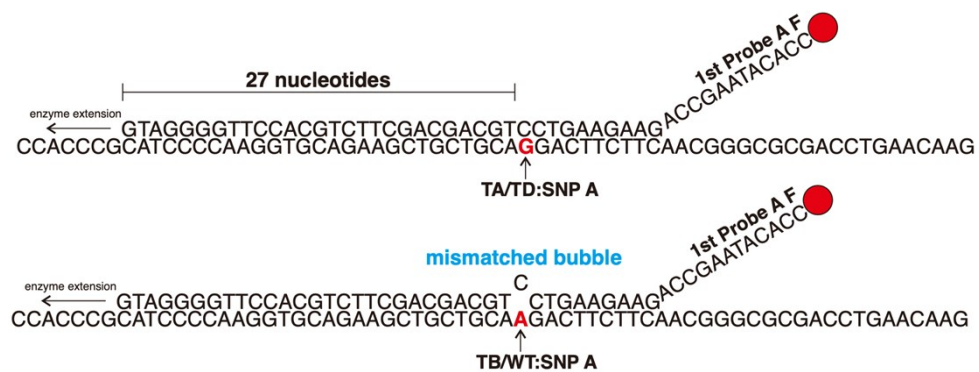

**Figure S5** a) Fluorescence measurement of 20nM four haplotypes hybridized with 20nM 1<sup>st</sup> probe A, 20nM probe B, 1uM dNTPs and 8 units bsm polymerase in A channel. b) Discrimination comparison towards TD and TB in B channel among 1<sup>st</sup>, 2<sup>nd</sup>, 3<sup>rd</sup>, 4<sup>th</sup> probe A. The result of 1<sup>st</sup> probe A was obtained without sink while others were with their related sink molecules. c) illustration of structure of 1<sup>st</sup> probe A binding to four targets in SNP A sites.

The 1<sup>st</sup> probe A with the highest  $\Delta\Delta G$ (table S2) was observed had lowest discrimination ability toward TB and TD in B channel though made a high distinguish between TB and TD in A channel, this can be explained by the hybridization structure when 1<sup>st</sup> probe A bound to WT/TB, due to the sequence with 27 nucleotides near the mismatched bubble (figure S3 c) is stable enough for the enzyme extension compared to 2, 3, 4 nucleotides of 3<sup>rd</sup> probe A, 4<sup>th</sup> probe A and 2<sup>nd</sup> probe A, thus stroking equilibrium that lead to small difference in TB and TD in B signal channel (figure S4 b) which even cannot be solved by sink. The kinetic process of 1<sup>st</sup> probe A reacted with four haplotypes (figure S4 a) was consistent with above hypothesis. To inhibit this effect, 4<sup>th</sup> probe A with short nucleotides and large discrimination was chosen for final experiments.

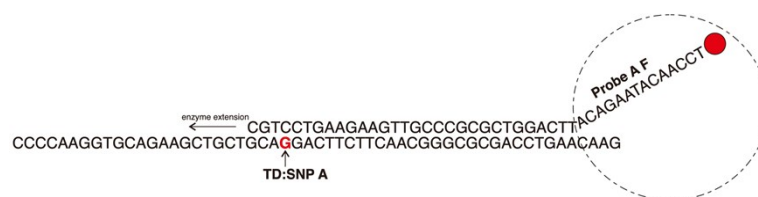

**Figure S6** The formed clamp structure by from 5' overhang region of toehold probe A and 3' overhang of the template can prohibit polymerase extension which will result in quenching of probe A fluorescence signal.

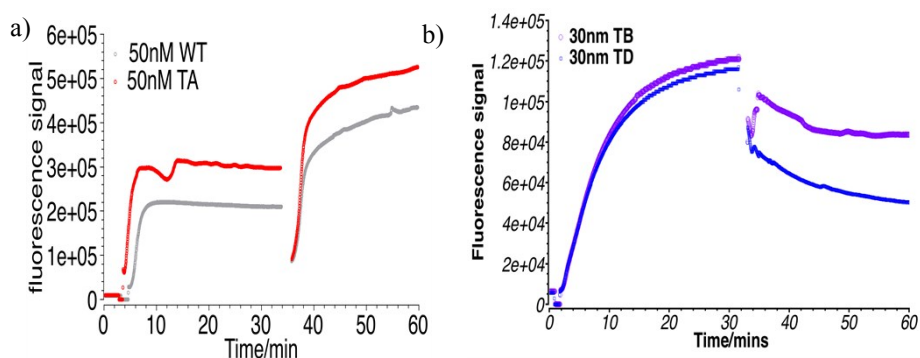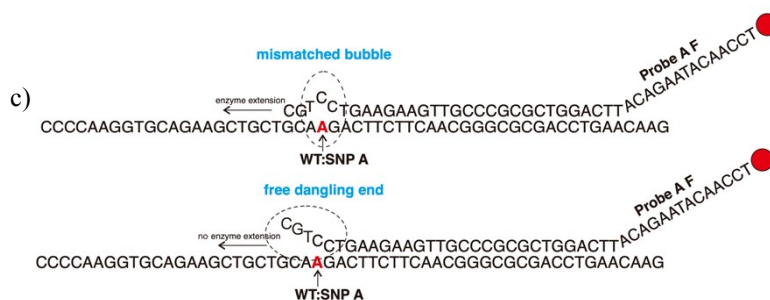

**Figure S7** Fluorescence signals of a) 50nM TB and TD incubated with 50nM probe A, 50nM probe B, 250nM sink, 2.5uM dNTPs and 20 units bsm in A channel; b) 30nM TB and TD incubated with 30nM probe A, 30nM probe B, 150nM sink, 1.5uM dNTPs and 12 units bsm in B channel; c) two possible states in SNP A site: mismatched bubble and free dangling end when probe A binds to target WT.

After enzyme addition, probe A signal increase was found both in WT and TA under 50 and 60 nM targets that suggests more and more probe A bound to target WT and TA which is consistent with the suddenly probe B signal drop evidence at second stage in 30nM (shown in figure S6 abc). This phenomenon demonstrated that the reaction rate to the right of following

equilibrium reaction can be intensified due to the rate of FT consumption by polymerase also increased when the concentration exceeded 20nM. Another interesting point that we found was the signal of WT also had the same growing trend, theoretically, this structure is less likely to form mismatch bubbles than the free dangling end structure (shown in figure S6 d) because two bases hybridization usually is unstable. However, the chance for forming mismatched bubble improved a lot with the increase of target and probe concentration thus WT can also be extended by polymerase that resulted in disequilibrium.

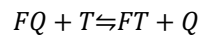

Supplement: d0ay00946f1.pdf [file d0ay00946f1.pdf]
